# Supplementary material for: Collaborative Implementation Planning to Jumpstart Advance Care Planning with Alaska Native and American Indian peoples in Primary Care
Source: Research Square preprint supplement (doi:10.21203/rs.3.rs-7400899/v1), 2025-09-19
Supplement: Supplementary file 1 [file 37693d783e2e662fa3409638.docx]

Appendix 1

**Employee Interview Guide**

*Thank you for taking part in this study. The goal of this study is to test a new intervention – Jumpstart AN/AI – to improve advance care planning among AN/AI peoples with serious illness. Advance care planning – or ACP – aligns a person’s care with their goals and values. It can improve the quality of life and health of patients with serious illness. It can also improve their family members’ health and wellbeing.*

*Jumpstart provides individualized “tips” to the patient and their provider for starting an ACP conversation. These tips are based on the patient’s personal preferences. In a clinical trial, people who received Jumpstart were significantly more likely to recall having ACP conversations with their provider. They were also more likely to have have advance directives in their medical records.*

*In an earlier study, we culturally tailored and piloted Jumpstart with 58 customer-owners. 95% of the those who received Jumpstart AN/AI said it helped them to have ACP conversations with their providers. Customer-owners who received Jumpstart AN/AI were 4 times more likely to have an advance directive at follow up than those who did not receive the intervention.*

*For this study, we are implementing and testing Jumpstart AN/AI in primary care. For this interview, we are interested in your input to help us develop an implementation plan.*

1. **To start, can you tell me why you volunteered to take part in this study?**
2. **To start, can you tell me a little about your role at SCF and the work you do?**

Probes: What is your job title? What are the responsibilities of this position? [If direct care] What type of care do you provide? [If not direct care] How does your work support the delivery of primary care services? Who are your “customers” [i.e. the people you serve or work with] in a typical workday?

1. **What are your experiences with directly or indirectly supporting advance care planning?**

Probes: How does your work involve issues related to, for example, goals of care conversations? Advance directives? End of life treatment preferences? Managing serious illness? Have you had a personal experience with Advance Care Planning?

1. **What are your initial reactions or thoughts about the Jumpstart intervention?**

Probes: What benefits do you think the Jumpstart could have for the health system or customer-owners? What challenges do you see implementing Jumpstart at SCF? What are your thoughts on how these challenges could be addressed or minimized? What about Jumpstart or SCF could support implementation?

*The first part of the Jumpstart intervention is for the customer-owner to complete a questionnaire about their experiences and preferences for advance care planning (show interviewee sample questionnaire and Jumpstart form). This information is used to populate the individualized, 1-page form that goes back to the customer-owner and their provider with tips for having an ACP conversation.*

1. **How do you think this initial information should be collected from the customer-owner?**

Probes: What do you think about giving the customer-owner a tablet to do this in the waiting room? What do you think about having them do this online, for example, on the patient portal? Who should be directly involved in this process? Indirectly involved?

*The next part of the Jumpstart is to give the customer-owner and the provider each a 1-page form with information about the customer-owner’s preferences for talking about ACP and tips for starting a conversation.*

1. **How and when should the 1-page form be provided to the customer-owner?**

Probes:

- On paper?
- Electronically, e.g., email to customer-owner or through patient portal?
- By mail?
- In-person (by whom – e.g., BHC, PCP, CMA, other)?
- Some combination of these?
- If a customer-owner answers questions online before an appointment, how might you want the tips to be shared? And when (immediately, before or at the appointment)?
- If a customer-owner answers questions on a tablet in the waiting room before an appointment, how might you want the tips to be shared?
- Is there anyone else you think should receive the tips?

1. **How and when should the 1-page form be provided to providers?**

Probes:

- Electronically: Flags in EHR secure email
- Paper: Paper form when patient comes to appointment
- When?
- Is there anyone else on the care team you think should receive the tips?

1. **From your perspective in the health care system as a [insert person’s role, e.g., PCP], what are the main considerations that need to be made before implementing Jumpstart in primary care?**

Probes: For instance, what plans will be needed with regard to documentation, billing, policies and procedures, reporting, workflows, or training? Whose work will be most impacted by implementing Jumpstart in primary care? How will it be impacted? What type of training will staff need to ensure this intervention is implemented successfully? How would you suggest this be provided?

1. **How can we measure whether a new intervention is successfully implemented?**

Probes: How do you know if a new intervention is “working” or should be discontinued? e.g., staff and/or C-O feedback, dashboard reports, other?

Follow up: What if any adjustments would you suggest for measuring and monitoring Jumpstart implementation?

1. **What would be the best indicators for monitoring clinical effectiveness of Jumpstart?**

Probes: How would you know if it’s improving customer-owner outcomes (quality of life, symptoms, experience of the health system)?

1. **What other concerns, considerations or suggestions do you have for us?**
