# Supplementary material for: Collaborative Implementation Planning to Jumpstart Advance Care Planning with Alaska Native and American Indian peoples in Primary Care
Source: Research Square preprint supplement (doi:10.21203/rs.3.rs-7400899/v1), 2025-09-19
Supplement: Supplementary file 2 [file 6c09e9dfdb52057fc8d80061.docx]

Appendix 2

**Customer-Owner Interview Guide**

*Thank you for agreeing to take part in this study. Your input will help improve health care at SCF for people with serious illness.*

*Advance care planning (ACP) involves a conversation between a person, their family, and healthcare providers. The conversation is about the person’s priorities and the goals of their care. This might include talking about how much medical care a person wants and who can make medical decisions for them. ACP can also include conversation about matters to them and their family. ACP can improve quality of life among people with illness and their family members. ACP can also decrease symptoms. People are more likely to benefit from ACP when it happens earlier in an illness.*

*In a previous study, we adapted an ACP intervention called Jumpstart with Alaska Native and American Indian people. The adapted intervention is called Jumpstart AN/AI. We want to implement Jumpstart AN/AI at SCF and test whether it increases advance care planning. To do that, we are asking customer-owners for feedback to help us get the Jumpstart AN/AI used in primary care.*

*As we talk about ACP and Jumpstart in this interview, I want to say that ACP and end-of-life care topics can be sensitive or tough issues to discuss. Let me know if you’d like to take a break or wish not to answer a question.*

Warm-up/background:

1. **Can you share a little about why you decided to participate in the study?**

*Thank you for sharing. Next, I will tell you about the Jumpstart intervention and then ask some questions.*

*Here is a figure that shows the flow of the Jumpstart intervention (Appendix K).*

*First, the customer-owner answers questions about their experiences and preferences for advance care planning.*

[Provide participants questionnaire and an example Jumpstart form.]

*Next, the customer-owner receives a Jumpstart form with suggestions for how to talk about advance care planning with their provider. Their provider also receives a Jumpstart form with suggestions for how to talk about advance care planning with the customer-owner. For example, the customer-owner’s Jumpstart provides two questions they can ask their provider* [point to the 2 questions on Jumpstart form]. *The form encourages the customer-owner and the provider to talk about advance care planning at their next visit.*

*In research studies, the Jumpstart form increased conversations about ACP. But it has not been used in routine health care. This study is helping us learn how to use Jumpstart in routine primary care with customer-owners.*

1. **I mentioned that the customer-owner answers questions before talking with their provider. How do you think the information should be collected from customer-owners before their primary care appointments?**

Probes:

- What do you think about giving the customer-owner a tablet to do this in the waiting room?
- What do you think about having them do this online, for example, on the patient portal?
- Who should be directly involved in this process? (Note: sometimes COs refer to CMAs as nurses, may need to seek clarification) Indirectly involved?
- Do you see any challenges with using technology (table, online) to collect this information?
- What do you think about giving people multiple options?
- Which options do you think would appeal most to older customer-owners?

*Next, the Jumpstart form will give the customer-owner prompts or “tips” or suggestions for starting a conversation about advance care planning with their provider at the next visit.*

1. **How should the Jumpstart form with the conversation “tips” be provided to the customer-owner before their next appointment?**

Probes:

- On paper?
- Electronically, e.g., email to customer-owner or through patient portal?
- By mail?
- In-person? If so, by whom – e.g., BHC, PCP, CMA, other?
- Some combination of these?
- If a customer-owner answers questions online before an appointment, how might you want the tips to be shared? And when (immediately, before or at the appointment)?
- If a customer-owner answers questions on a tablet in the waiting room before an appointment, how might you want the tips to be shared?
- Is there anyone else you think should receive the tips?

1. **From your perspective in the health care system as a customer-owner, what are the main things we should keep in mind before using Jumpstart in primary care at SCF?**

Probes:

- How would you suggest the tip sheet and Jumpstart form be provided?
- Should Jumpstart be shared the same for everyone?
- What concerns do you have about how this gets used in primary care?
- What do you think will help this get used in primary care?
- What communication should customer-owners receive about Jumpstart (individually and as a community)?
